# Supplementary material for: Frequency, Spectrum, and Stability of Leaf Mutants Induced by Diverse γ-Ray Treatments in Two Cymbidium Hybrids
Source: MDPI journal article supplement (doi:10.3390/plants9040546), 2020-04-23
Supplement: s1 [file s1]

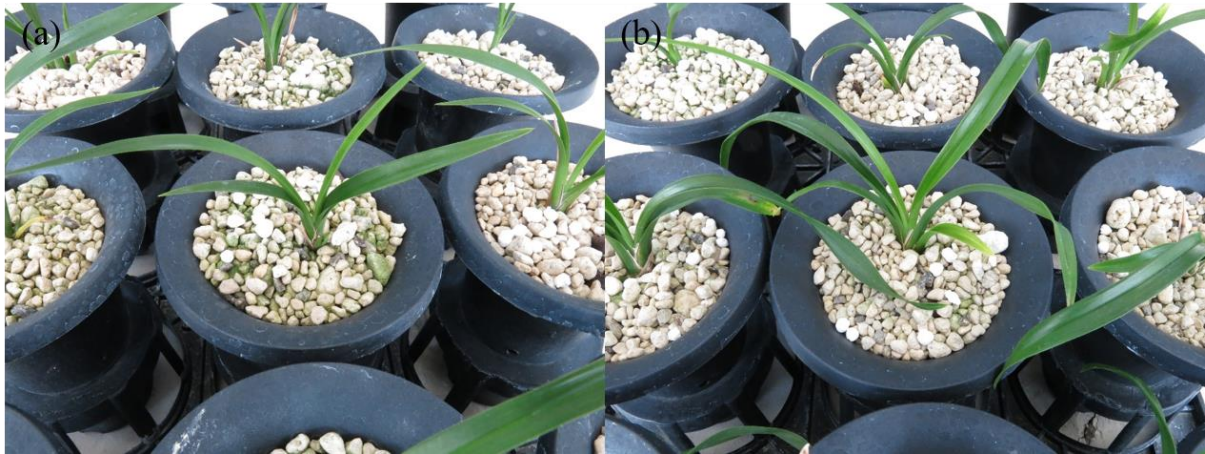

**Figure S1.** The phenotypes of the two *Cymbidium* hybrids, RB003 and RB012, used for this study. (a) RB003; (b) RB012.

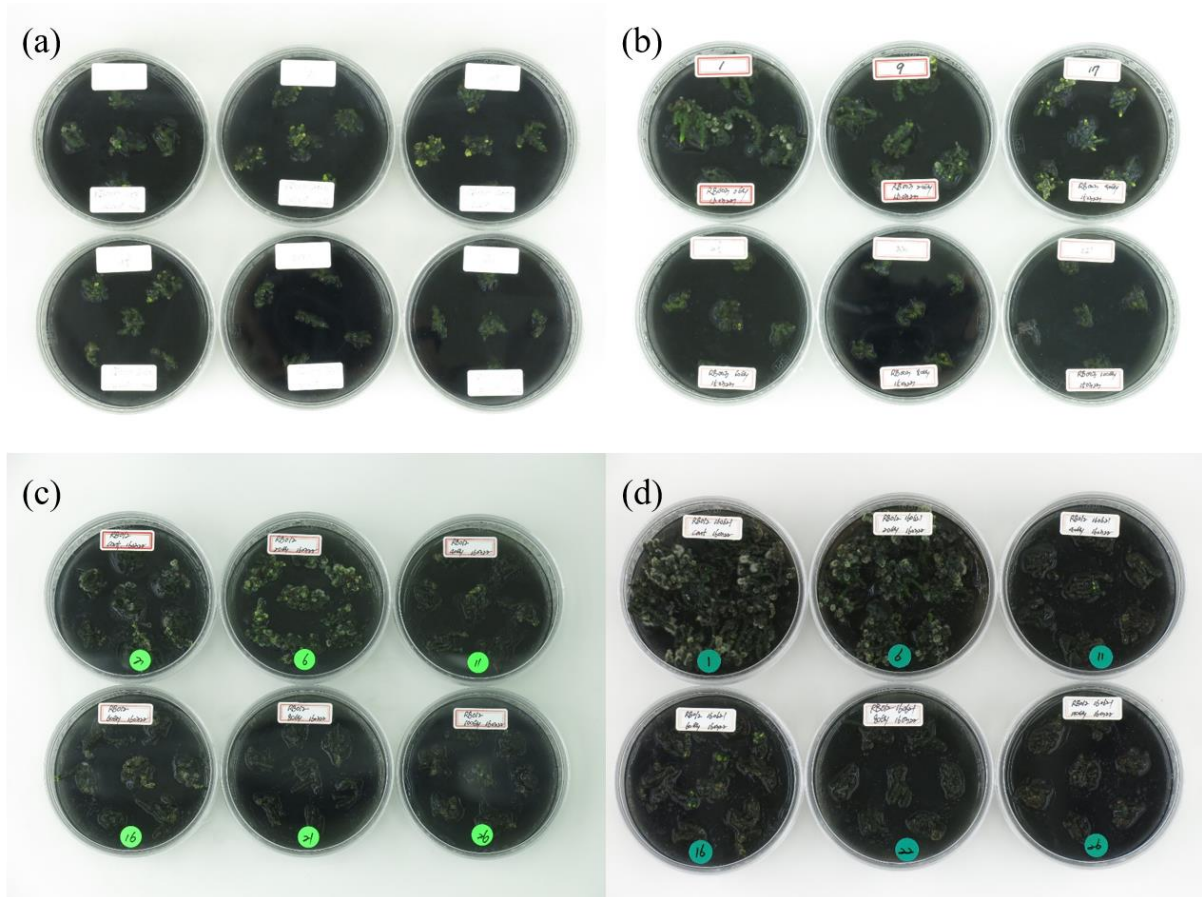

**Figure S2.** Growth response of rhizomes of the *Cymbidium* hybrids, RB003 and RB012 at 3 and 6 months after  $\gamma$ -irradiation. (a) RB003, 3 months after  $\gamma$ -irradiation; (b) RB003, 6 months after  $\gamma$ -irradiation; (c) RB012, 3 months after  $\gamma$ -irradiation; (d) RB012, 6 months after  $\gamma$ -irradiation. From the upper left: 0, 20, 40, 60, 80, and 100 Gy treatments.
